# Supplementary material for: In Situ Electroporation on PERFECT Filter for High-Efficiency and High-Viability Tumor Cell Labeling
Source: MDPI journal article supplement (doi:10.3390/mi13050672), 2022-04-26
Supplement: s1 [file s1]

# In-Situ Electroporation on PERFECT Filter for High-efficiency and High-viability Tumor Cell Labeling

Tingting Hun<sup>1</sup>, Yi Zhang<sup>1</sup>, Qingmei Xu<sup>1</sup>, Dong Huang<sup>1,2</sup>, Qi Wang<sup>3</sup>, Zhihong Li<sup>1,2</sup>, Wei Wang<sup>1,2,4\*</sup>

<sup>1</sup> School of integrated circuits, Peking University, Beijing, 100871, China

<sup>2</sup> National Key Laboratory of Science and Technology on Micro/Nano Fabrication, Beijing, 100871, China

<sup>3</sup> Department of Respiratory Medicine, the Second Affiliated Hospital of Dalian Medical University, Dalian, 116027, China

<sup>4</sup> Frontiers Science Center for Nano-optoelectronics, Peking University, Beijing, 100871, China

\* Correspondence: w.wang@pku.edu.cn

Electronic Supplementary Information (ESI) available: Figure S1, Figure S2 and

Table S1. See DOI:

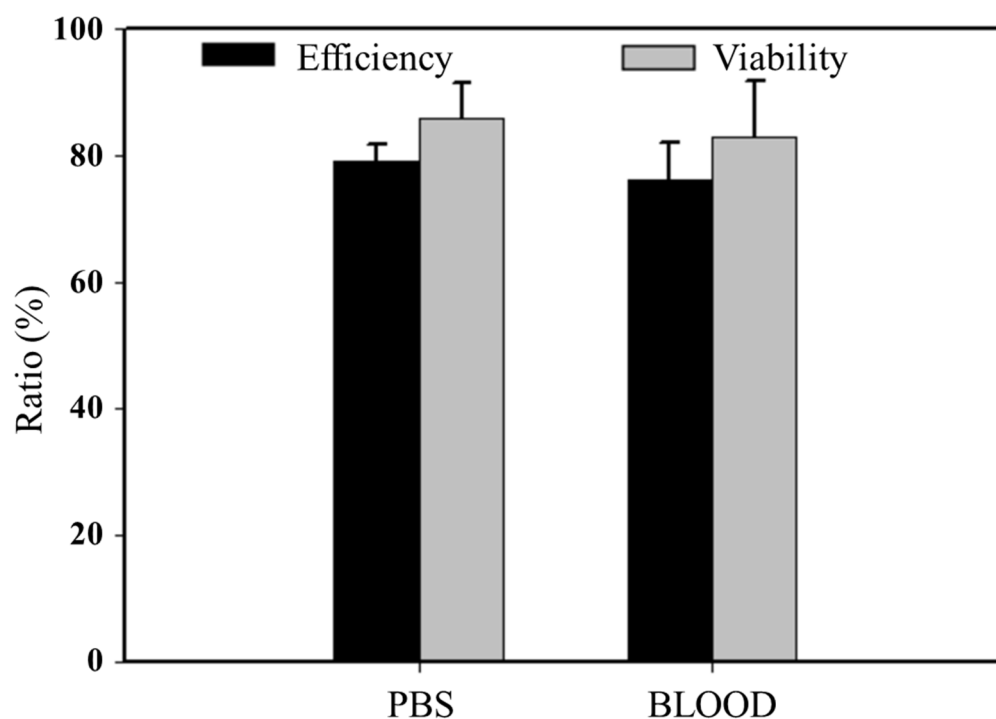

**Figure S1.** The separation efficiency and cell viability of 10000 1601 cells in 1 mL PBS or whole blood.

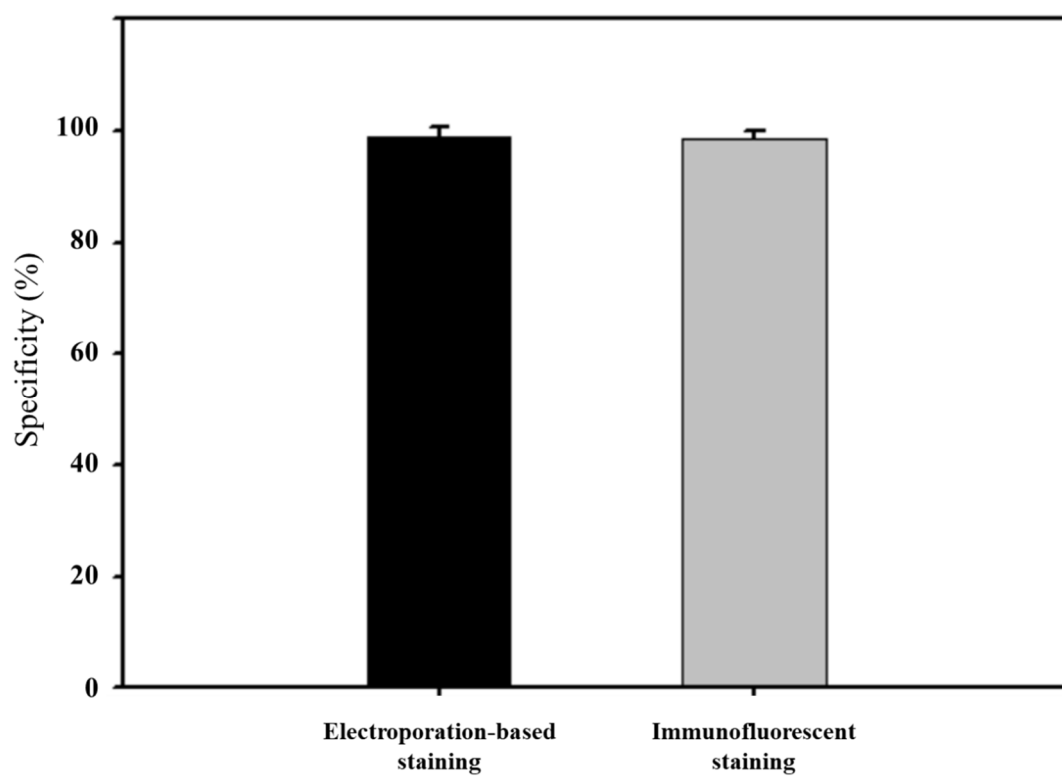

**Figure S2.** A comparison of transfection specificity for the proposed system and the traditional IF staining.

Table S1. The optimum parameters of three types of molecules

| Type of molecules   | Electric field strengths | Pulse duration | Pulses number | Pulse interval |
|---------------------|--------------------------|----------------|---------------|----------------|
| Small molecule dyes | 1.5 kV/cm                | 100 $\mu$ s    | 3             | 1000 ms        |
| Plasmid             | 1.5 kV/cm                | 100 $\mu$ s    | 3             | 1000 ms        |
| Functional proteins | 1.5 kV/cm                | 3000 $\mu$ s   | 3             | 1000 ms        |
